# Supplementary material for: Vielleaureite-(Ce), a new epidote of the dollaseite group, coexisting with Mn-dominant hellandite in Mn deposits of the central Pyrenees
Source: Copernicus journal article supplement (doi:10.5194/ejm-37-627-2025), 2025-09-15

## checkCIF/PLATON report

Structure factors have been supplied for datablock(s) vielleaureite-Ce

THIS REPORT IS FOR GUIDANCE ONLY. IF USED AS PART OF A REVIEW PROCEDURE FOR PUBLICATION, IT SHOULD NOT REPLACE THE EXPERTISE OF AN EXPERIENCED CRYSTALLOGRAPHIC REFEREE.

No syntax errors found.      CIF dictionary      Interpreting this report

### Datablock: vielleaureite-Ce

---

Bond precision:      Si- O = 0.0070 Å      Wavelength=0.71073

Cell:                      a=8.8238(13)      b=5.7131(9)      c=10.0034(16)  
                             alpha=90      beta=112.823(6)      gamma=90

Temperature:      293 K

|                        | Calculated                                                                                                                                  | Reported                                                                                                                                    |
|------------------------|---------------------------------------------------------------------------------------------------------------------------------------------|---------------------------------------------------------------------------------------------------------------------------------------------|
| Volume                 | 464.80(13)                                                                                                                                  | 464.80(13)                                                                                                                                  |
| Space group            | P 21/m                                                                                                                                      | P 21/m                                                                                                                                      |
| Hall group             | -P 2yb                                                                                                                                      | -P 2yb                                                                                                                                      |
| Moiety formula         | Al <sub>3.43</sub> Ce <sub>1.93</sub> H <sub>2</sub> Mn <sub>4.07</sub> O <sub>26</sub> Si <sub>6</sub> , 2(Ca <sub>0.25</sub> ), 0.066(Ca) | Al <sub>3.43</sub> Ce <sub>1.93</sub> H <sub>2</sub> Mn <sub>4.07</sub> O <sub>26</sub> Si <sub>6</sub> , 2(Ca <sub>0.25</sub> ), 0.066(Ca) |
| Sum formula            | Al <sub>3.43</sub> Ca <sub>0.57</sub> Ce <sub>1.93</sub> H <sub>2</sub> Mn <sub>4.07</sub> O <sub>26</sub> Si <sub>6</sub>                  | Al <sub>3.43</sub> Ca <sub>0.57</sub> Ce <sub>1.93</sub> H <sub>2</sub> Mn <sub>4.07</sub> O <sub>26</sub> Si <sub>6</sub>                  |
| Mr                     | 1196.49                                                                                                                                     | 1196.49                                                                                                                                     |
| Dx, g cm <sup>-3</sup> | 4.275                                                                                                                                       | 4.275                                                                                                                                       |
| Z                      | 1                                                                                                                                           | 1                                                                                                                                           |
| Mu (mm <sup>-1</sup> ) | 8.174                                                                                                                                       | 8.174                                                                                                                                       |
| F000                   | 563.9                                                                                                                                       | 564.0                                                                                                                                       |
| F000'                  | 565.84                                                                                                                                      |                                                                                                                                             |
| h, k, lmax             | 14, 9, 16                                                                                                                                   | 14, 9, 16                                                                                                                                   |
| Nref                   | 2232                                                                                                                                        | 2224                                                                                                                                        |
| Tmin, Tmax             | 0.783, 0.849                                                                                                                                | 0.819, 0.923                                                                                                                                |
| Tmin'                  | 0.783                                                                                                                                       |                                                                                                                                             |

Correction method= # Reported T Limits: Tmin=0.819 Tmax=0.923

AbsCorr = MULTI-SCAN

Data completeness= 0.996

Theta(max)= 35.123

R(reflections)= 0.0575( 1565)

wR2(reflections)=  
0.1373( 2224)

S = 1.028

Npar= 126

The following ALERTS were generated. Each ALERT has the format

**test-name\_ALERT\_alert-type\_alert-level.**

Click on the hyperlinks for more details of the test.

---

#### Alert level A

|                   |                                        |      |            |
|-------------------|----------------------------------------|------|------------|
| PLAT974_ALERT_2_A | Check Calcd Negative Resid. Density on | A2CE | -2.07 eA-3 |
| PLAT974_ALERT_2_A | Check Calcd Negative Resid. Density on | A2CA | -2.07 eA-3 |

---

#### Alert level B

|                   |                          |                   |            |
|-------------------|--------------------------|-------------------|------------|
| PLAT972_ALERT_2_B | Check Calcd Resid. Dens. | 0.67Ang From A2CE | -2.60 eA-3 |
| PLAT975_ALERT_2_B | Check Calcd Resid. Dens. | 0.92Ang From O10  | 1.65 eA-3  |

---

#### Alert level C

|                   |                                                  |                   |            |
|-------------------|--------------------------------------------------|-------------------|------------|
| PLAT077_ALERT_4_C | Unitcell Contains Non-integer Number of Atoms .. | Please Check      |            |
| PLAT927_ALERT_1_C | Reported and Calculated wR2 Differ by .....      | -0.0013 Check     |            |
| PLAT971_ALERT_2_C | Check Calcd Resid. Dens.                         | 0.81Ang From A2CE | 2.10 eA-3  |
| PLAT971_ALERT_2_C | Check Calcd Resid. Dens.                         | 0.86Ang From O6   | 1.66 eA-3  |
| PLAT971_ALERT_2_C | Check Calcd Resid. Dens.                         | 0.92Ang From O10  | 1.65 eA-3  |
| PLAT971_ALERT_2_C | Check Calcd Resid. Dens.                         | 1.21Ang From A2CE | 1.62 eA-3  |
| PLAT971_ALERT_2_C | Check Calcd Resid. Dens.                         | 0.73Ang From M3AL | 1.59 eA-3  |
| PLAT971_ALERT_2_C | Check Calcd Resid. Dens.                         | 1.52Ang From O9   | 1.51 eA-3  |
| PLAT972_ALERT_2_C | Check Calcd Resid. Dens.                         | 0.65Ang From A2CE | -2.34 eA-3 |
| PLAT972_ALERT_2_C | Check Calcd Resid. Dens.                         | 0.62Ang From A2CE | -2.21 eA-3 |
| PLAT975_ALERT_2_C | Check Calcd Resid. Dens.                         | 0.63Ang From O8   | 1.49 eA-3  |
| PLAT975_ALERT_2_C | Check Calcd Resid. Dens.                         | 0.73Ang From O6   | 1.12 eA-3  |
| PLAT976_ALERT_2_C | Check Calcd Resid. Dens.                         | 1.07Ang From O8   | -1.14 eA-3 |

---

#### Alert level G

|                   |                                                  |              |        |
|-------------------|--------------------------------------------------|--------------|--------|
| PLAT004_ALERT_5_G | Polymeric Structure Found with Maximum Dimension | 3            | Info   |
| PLAT068_ALERT_1_G | Reported F000 Differs from Calcd (or Missing)... | Please Check |        |
| PLAT083_ALERT_2_G | SHELXL Second Parameter in WGHT Unusually Large  | 6.38         | Why ?  |
| PLAT168_ALERT_4_G | The CIF-Embedded .res File Contains EXYZ Records | 4            | Report |
| PLAT171_ALERT_4_G | The CIF-Embedded .res File Contains EADP Records | 4            | Report |
| PLAT199_ALERT_1_G | Reported _cell_measurement_temperature .....     | 293          | Check  |
| PLAT200_ALERT_1_G | Reported _diffrn_ambient_temperature .....       | 293          | Check  |
| PLAT301_ALERT_3_G | Main Residue Disorder .....                      | 27%          | Note   |
| PLAT302_ALERT_4_G | Anion/Solvent/Minor-Residue Disorder (Resd 2 )   | 100%         | Note   |
| PLAT302_ALERT_4_G | Anion/Solvent/Minor-Residue Disorder (Resd 3 )   | 100%         | Note   |
| PLAT303_ALERT_2_G | Full Occupancy Atom H with # Connections         | 3.00         | Check  |
| PLAT396_ALERT_2_G | Deviating Si-O-Si Angle From 150 for O9          | 136.2        | Degree |
| PLAT720_ALERT_4_G | Number of Unusual/Non-Standard Labels .....      | 9            | Note   |
| PLAT883_ALERT_1_G | No Info/Value for _atom_sites_solution_primary . | Please Do !  |        |
| PLAT912_ALERT_4_G | Missing # of FCF Reflections Above STh/L= 0.600  | 8            | Note   |
| PLAT965_ALERT_2_G | The SHELXL WEIGHT Optimisation has not Converged | Please Check |        |
| PLAT982_ALERT_1_G | The Al-f' = 0.0560 Deviates from IT-value =      | 0.0645       | Check  |
| PLAT982_ALERT_1_G | The Ca-f' = 0.2030 Deviates from IT-value =      | 0.2262       | Check  |

|                   |             |         |               |            |         |       |
|-------------------|-------------|---------|---------------|------------|---------|-------|
| PLAT982_ALERT_1_G | The Ce-f' = | -0.5640 | Deviates from | IT-value = | -0.2486 | Check |
| PLAT982_ALERT_1_G | The Mn-f' = | 0.2950  | Deviates from | IT-value = | 0.3368  | Check |
| PLAT982_ALERT_1_G | The O-f' =  | 0.0080  | Deviates from | IT-value = | 0.0106  | Check |
| PLAT982_ALERT_1_G | The Si-f' = | 0.0720  | Deviates from | IT-value = | 0.0817  | Check |
| PLAT983_ALERT_1_G | The Ce-f" = | 2.6320  | Deviates from | IT-Value = | 2.6331  | Check |

---

2 **ALERT level A** = Most likely a serious problem - resolve or explain  
 2 **ALERT level B** = A potentially serious problem, consider carefully  
 13 **ALERT level C** = Check. Ensure it is not caused by an omission or oversight  
 23 **ALERT level G** = General information/check it is not something unexpected

12 ALERT type 1 CIF construction/syntax error, inconsistent or missing data  
 19 ALERT type 2 Indicator that the structure model may be wrong or deficient  
 1 ALERT type 3 Indicator that the structure quality may be low  
 7 ALERT type 4 Improvement, methodology, query or suggestion  
 1 ALERT type 5 Informative message, check

---

It is advisable to attempt to resolve as many as possible of the alerts in all categories. Often the minor alerts point to easily fixed oversights, errors and omissions in your CIF or refinement strategy, so attention to these fine details can be worthwhile. In order to resolve some of the more serious problems it may be necessary to carry out additional measurements or structure refinements. However, the purpose of your study may justify the reported deviations and the more serious of these should normally be commented upon in the discussion or experimental section of a paper or in the "special\_details" fields of the CIF. checkCIF was carefully designed to identify outliers and unusual parameters, but every test has its limitations and alerts that are not important in a particular case may appear. Conversely, the absence of alerts does not guarantee there are no aspects of the results needing attention. It is up to the individual to critically assess their own results and, if necessary, seek expert advice.

### Publication of your CIF in IUCr journals

A basic structural check has been run on your CIF. These basic checks will be run on all CIFs submitted for publication in IUCr journals (*Acta Crystallographica*, *Journal of Applied Crystallography*, *Journal of Synchrotron Radiation*); however, if you intend to submit to *Acta Crystallographica Section C* or *E* or *IUCrData*, you should make sure that full publication checks are run on the final version of your CIF prior to submission.

### Publication of your CIF in other journals

Please refer to the *Notes for Authors* of the relevant journal for any special instructions relating to CIF submission.

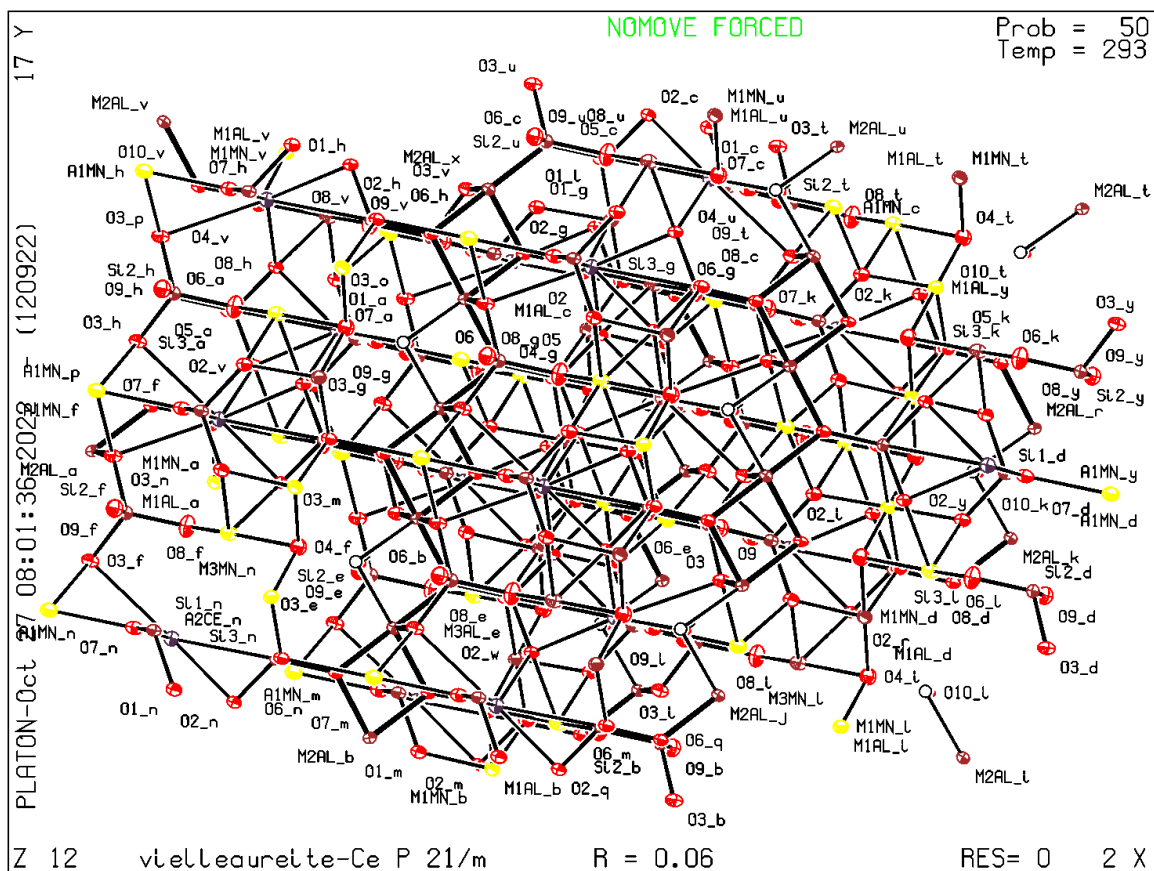

Supplement: Supplementary file 1 [file 2022-134_VIELLEAUREITE-(Ce)_checkCIF.pdf › 2022-134_VIELLEAUREITE-(Ce)_checkCIF.pdf]
