# Supplementary material for: Vielleaureite-(Ce), a new epidote of the dollaseite group, coexisting with Mn-dominant hellandite in Mn deposits of the central Pyrenees
Source: Copernicus journal article supplement (doi:10.5194/ejm-37-627-2025), 2025-09-15
Supplement: Supplementary file 2 [file Supplementary material_rev2_30_6_2025.pdf › Supplementary material_rev2_30_6_2025.pdf]

## Supplementary material

### 1. Chemistry

5 **Table S1.** Vielleaureite-(Ce) electron-microprobe analyses averaged in Table 1, formulae on the basis of 8 cations.

| Constituent                    | An. 60 | An. 61 | An. 62 | An. 63 |
|--------------------------------|--------|--------|--------|--------|
| P <sub>2</sub> O <sub>5</sub>  | 0.00   | 0.02   | 0.05   | 0.05   |
| SiO <sub>2</sub>               | 28.84  | 27.51  | 28.79  | 27.19  |
| B <sub>2</sub> O <sub>3</sub>  | 0.00   | 0.00   | 0,09   | 0,01   |
| Al <sub>2</sub> O <sub>3</sub> | 8,59   | 8,00   | 8,20   | 8,97   |
| V <sub>2</sub> O <sub>3</sub>  | 1.33   | 0.39   | 0.78   | 4.00   |
| Fe <sub>2</sub> O <sub>3</sub> | 0.60   | 0.18   | 0.30   | 1.73   |
| MnO <sub>tot</sub>             | 21.97  | 22.52  | 22.73  | 19.76  |
| Y <sub>2</sub> O <sub>3</sub>  | 0.05   | 0.04   | 0.06   | 0.03   |
| La <sub>2</sub> O <sub>3</sub> | 9.03   | 8.10   | 8.09   | 8.22   |
| Ce <sub>2</sub> O <sub>3</sub> | 17.47  | 17.18  | 17.16  | 17.11  |
| Nd <sub>2</sub> O <sub>3</sub> | 0.15   | 0.71   | 0.60   | 0.81   |
| Sm <sub>2</sub> O <sub>3</sub> | 0.03   | 0.00   | 0.03   | 0.07   |
| Gd <sub>2</sub> O <sub>3</sub> | 0.00   | 0.00   | 0.02   | 0.19   |
| Dy <sub>2</sub> O <sub>3</sub> | 0.00   | 0.06   | 0.00   | 0.00   |
| Er <sub>2</sub> O <sub>3</sub> | 0.51   | 0.77   | 0.08   | 0.30   |
| Yb <sub>2</sub> O <sub>3</sub> | 0.00   | 0.00   | 0.12   | 0.00   |
| MgO                            | 5.07   | 5.81   | 5.92   | 2.02   |
| CaO                            | 1.36   | 0.57   | 0.64   | 2.27   |
| SrO                            | 0.00   | 0.00   | 0.00   | 0.03   |
| Na <sub>2</sub> O              | 0.00   | 0.06   | 0.03   | 0.01   |
| F                              | 2.77   | 3.38   | 3.14   | 0.94   |
| Cl                             | 0.04   | 0.02   | 0.03   | 0.06   |
| – O = F,Cl                     | 1.18   | 1.43   | 1.33   | 0.41   |
| Total                          | 98.98  | 96.73  | 98.17  | 94.16  |
| P                              | 0.00   | 0.00   | 0.00   | 0.00   |
| Si                             | 2.95   | 2.91   | 2.96   | 2.93   |
| B                              | 0.00   | 0.00   | 0.02   | 0.00   |
| Al                             | 1.04   | 1.00   | 0.99   | 1.14   |
| V                              | 0.11   | 0.03   | 0.06   | 0.34   |
| Fe                             | 0.05   | 0.01   | 0.02   | 0.14   |
| Mn                             | 1.91   | 2.02   | 1.98   | 1.80   |
| Y                              | 0.00   | 0.00   | 0.00   | 0.00   |
| La                             | 0.34   | 0.32   | 0.31   | 0.33   |
| Ce                             | 0.66   | 0.66   | 0.65   | 0.67   |

|            |       |       |       |       |
|------------|-------|-------|-------|-------|
| Nd         | 0.01  | 0.03  | 0.02  | 0.03  |
| Sm         | 0.00  | 0.00  | 0.00  | 0.00  |
| Gd         | 0.00  | 0.00  | 0.00  | 0.01  |
| Dy         | 0.00  | 0.00  | 0.00  | 0.00  |
| Er         | 0.02  | 0.03  | 0.00  | 0.01  |
| Yb         | 0.00  | 0.00  | 0.00  | 0.00  |
| Mg         | 0.77  | 0.91  | 0.91  | 0.32  |
| Ca         | 0.15  | 0.06  | 0.07  | 0.26  |
| Sr         | 0.00  | 0.00  | 0.00  | 0.00  |
| Na         | 0.00  | 0.01  | 0.01  | 0.00  |
| F          | 0.90  | 1.13  | 1.02  | 0.32  |
| Cl         | 0.01  | 0.00  | 0.00  | 0.01  |
| Total cat. | 8.000 | 8.000 | 8.000 | 8.000 |

## 2. Crystallography

15 **Table S2.** Observed and calculated X-ray powder diffraction data ( $d$  in Å) for vielleaureite-(Ce). The strongest observed reflections are given in bold.

| $hkl$ | <b>1</b>         |                  | <b>2</b>          |                   |
|-------|------------------|------------------|-------------------|-------------------|
|       | $d_{\text{obs}}$ | $I_{\text{est}}$ | $d_{\text{calc}}$ | $I_{\text{calc}}$ |
| 001   | -                | -                | 9.2202            | 30                |
| 100   | -                | -                | 8.1329            | 29                |
| -101  | -                | -                | 7.7765            | 14                |
| 101   | 5.18             | 25               | 5.1829            | 19                |
| 011   | -                | -                | 4.8564            | 9                 |
| 110   | 4.67             | 20               | 4.6749            | 20                |
| 002   | -                | -                | 4.6101            | 9                 |
| -112  | -                | -                | 3.7237            | 11                |
| 012   | -                | -                | 3.5877            | 10                |
| -211  | <b>3.485</b>     | <b>35</b>        | 3.4883            | 42                |
| 210   | -                | -                | 3.3129            | 15                |
| 201   | -                | -                | 3.2804            | 11                |
| -212  | -                | -                | 3.2144            | 6                 |
| -113  | <b>2.881</b>     | <b>100</b>       | 2.8797            | 100               |
| -302  | -                | -                | 2.8743            | 20                |
| 020   | <b>2.858</b>     | <b>40</b>        | 2.8565            | 42                |
| 211   | -                | -                | 2.8448            | 14                |
| 300   | -                | -                | 2.7110            | 9                 |
| 013   | 2.708            | 25               | 2.7066            | 30                |
| 120   | <b>2.693</b>     | <b>30</b>        | 2.6951            | 32                |
| -311  | <b>2.600</b>     | <b>55</b>        | 2.6044            | 54                |
| -303  | -                | -                | 2.5922            | 7                 |
| 202   | 2.589            | 20               | 2.5914            | 26                |
| -313  | -                | -                | 2.3606            | 10                |
| -222  | -                | -                | 2.3021            | 11                |
| -304  | -                | -                | 2.2354            | 6                 |
| 122   | -                | -                | 2.2064            | 7                 |
| -401  | 2.169            | 15               | 2.1705            | 21                |
| 221   | -                | -                | 2.1543            | 16                |
| 014   | -                | -                | 2.1376            | 6                 |
| -223  | 2.098            | 15               | 2.0997            | 20                |
| 203   | -                | -                | 2.0924            | 10                |
| 023   | -                | -                | 2.0924            | 14                |
| 222   | -                | -                | 1.9193            | 17                |
| 114   | -                | -                | 1.9057            | 7                 |
| -224  | -                | -                | 1.8619            | 7                 |
| -231  | -                | -                | 1.7480            | 6                 |
| -415  | -                | -                | 1.6674            | 6                 |
| -206  | -                | -                | 1.6671            | 6                 |
| -133  | -                | -                | 1.6537            | 13                |
| 322   | -                | -                | 1.6490            | 8                 |
| -106  | -                | -                | 1.6297            | 9                 |
| -424  | 1.606            | 20               | 1.6072            | 21                |
| 115   | -                | -                | 1.5981            | 9                 |
| -331  | -                | -                | 1.5961            | 12                |
| 412   | -                | -                | 1.5765            | 8                 |
| -406  | -                | -                | 1.5484            | 6                 |
| -226  | -                | -                | 1.4399            | 7                 |
| 215   | -                | -                | 1.4306            | 5                 |
| 040   | -                | -                | 1.4283            | 14                |
| 422   | -                | -                | 1.4224            | 7                 |

1 = observed diffraction pattern; 2 = calculated diffraction pattern obtained with the atom coordinates reported in Table 4 and with the site populations given in Table 5 (only reflections with  $I_{\text{rel}} \geq 5$  are listed).

### 3. NanoSIMS analysis of hellandite

25 The B, Be, Li and H concentrations in hellandite were determined with the Cameca  
NanoSIMS 50 operated at Muséum national d'Histoire naturelle in Paris. We used the oxygen  
RF plasma source to produce a 16 keV O<sup>-</sup> primary beam. Samples were gold coated (20 nm  
thick before analysis). During a first session, secondary ions of <sup>7</sup>Li<sup>+</sup>, <sup>9</sup>Be<sup>+</sup>, <sup>11</sup>B<sup>+</sup>, <sup>27</sup>Al<sup>+</sup> and  
28Si<sup>+</sup> were collected in multicollection mode using electron multipliers with a dead time of 44  
30 ns. Mass resolution exceeded 5500 to resolve mass interferences. Data acquisition was  
performed with the primary beam set at 20 pA and rastered over a 3×3 μm<sup>2</sup> surface area. Ions  
were exclusively collected from the inner 1.5×1.5 μm<sup>2</sup> using the beam blanking mode, in  
order to minimize surface contamination. Each analysis consisted of 100 cycles with a  
duration of 1.024 s. Each analysis was preceded by pre-sputtering on a 5×5 μm<sup>2</sup> surface area  
35 for 1 min using a 500 pA primary beam to remove gold coating, surface contamination and  
achieve a steady-state sputtering regime (Stephant et al., 2014). To determine OH content,  
secondary ions of <sup>28</sup>SiH<sup>+</sup> and <sup>30</sup>Si<sup>+</sup> were monitored in multicollection mode. Settings were  
identical with the exception of the primary-beam intensity set at 800 pA (for both analysis and  
presputtering). Ion ratios were converted into elemental ratios using a set of gem-quality  
40 crystals as standards (Table S3). The vacuum in the analysis chamber has never exceeded  
2.10<sup>-9</sup> torr.

**Table S3.** NanoSIMS calibrations.

|    |                                                                            |                                     |               |
|----|----------------------------------------------------------------------------|-------------------------------------|---------------|
| 45 | Calibration standards used for Li, Be and B analysis                       |                                     |               |
|    | Quartz, elbaite, spodumene, avdeevite, gadolinite, bertrandite, hingganite |                                     |               |
|    | Calibration equations                                                      |                                     |               |
|    | Li/Si                                                                      | $y = -0.037 x^2 + 0.269 x + 0.0097$ | $R^2 = 0.978$ |
| 50 | Be/Si                                                                      | $y = 0.1856 x^2 + 0.496 x + 0.0064$ | $R^2 = 0.982$ |
|    | B/Si                                                                       | $y = 2.5483 x$                      | $R^2 = 0.999$ |
|    | Calibration standards used for H analysis                                  |                                     |               |
|    | Quartz, elbaite, hingganite                                                |                                     |               |
| 55 | Calibration equation                                                       |                                     |               |
|    | OH/Si                                                                      | $y = 26,18263 x$                    | $R^2 = 0.971$ |

## 70

75

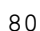

For each, the observed pattern is shown in the left panel. The right panel shows the pattern

indexed with the structure of Mn-rich hellandite-(Y) (Miyawaki et al., 2015); the mean angular deviation is  $0.63^\circ$  and  $0.66^\circ$ , respectively. Sample VAIN86.

## 5. On the nomenclature of Mn-rich hellandites

Considering the hellandite structural formula  $M3_2M4_2M2_2M1 \text{ }^T\Box_2\text{Si}_4\text{B}_4\text{O}_{22}(\text{OH},\text{F},\text{O})_2$  (Oberti et al., 2002, where  $^T\Box$  stands for tetrahedral vacancy) and that Mn is partitioned in  $M3$  in Mn-rich hellandite (Miyawaki et al., 2015), it may not be fortuitous that the Mn/(Mn+Ca) ratio of hellandite coexisting with vielleaureite-(Ce) does not exceed 0.67, suggesting that the endmember formula of the tentative new species could be  $\text{Mn}_2(\text{CaY})\text{Y}_2\text{AlB}_4\text{Si}_4\text{O}_{22}(\text{OH})_2$  as anticipated by Miyawaki et al. (2015), with a valency-imposed double occupancy in  $M4$ . In such case the divide between Ca-dominant and Mn-dominant hellandite would be  $\text{Mn}/(\text{Mn} + \text{Ca}) = 1/3$ . However, the nomenclature of the hellandite group (Oberti et al., 2002, 2019) is not based on individual crystallographic sites but on groups of similar sites, with the formula  $X_4Y_2ZT_2[\text{B}_4\text{Si}_4\text{O}_{22}]\text{W}_2$  in which  $X = M3 + M4$ , hence with the  $^X(\text{R}^{2+}_3\text{R}^{3+})$  charge arrangement in hellandite proper. In this case the divide between Ca-dominant and Mn-dominant hellandite is  $\text{Mn}^{2+}/(\text{Mn}^{2+} + \text{Ca}) = 0.5$ . The hellandite analysed in the vielleaureite-(Ce) samples satisfies the  $\text{Mn}^{2+}$ -dominance criterion in any event, it is a potential new species.

## Supplement references

Miyawaki, R., Moma, K., Yokoyama, K., Shigeoka, M., Matsubara, S., Ito, M., Nakai, I. and Kristiansen, R.: Mn-bearing hellandite-(Y) from the Heftetjern pegmatite, Tørdal, Norway, Can. Mineral., 53, 345-356, 2015.

Oberti, R., Della Ventura, G., Ottolini, L., Hawthorne, F.C., and Bonazzi, P.: Re-definition, nomenclature and crystal-chemistry of the hellandite group, Am. Mineral., 87, 745-752, 2002.

Oberti, R., Langone, A., Boiocchi, M., Bernabè, E., and Hawthorne, F.C.: News from the hellandite group: the redefinition of mottanaite and ciprianiite and the new mineral description of ferri-mottanaite-(Ce), the first  $\text{Fe}^{3+}$ -dominant hellandite, Eur. J. Mineral., 31, 799-806, <https://doi-org/10.1127/ejm/2019/0031-2858>, 2019.

Stephant, A., Remusat, L., Thomen, A., and Robert, F.: Reduction of OH contamination in quantification of water contents using NanoSIMS imaging, Chem. Geol., 380, 20-26, 2014.
