# Supplementary material for: Vielleaureite-(Ce), a new epidote of the dollaseite group, coexisting with Mn-dominant hellandite in Mn deposits of the central Pyrenees
Source: Copernicus journal article supplement (doi:10.5194/ejm-37-627-2025), 2025-09-15
Supplement: Supplementary file [file ejm-37-627-2025-supplement-title-page.pdf › ejm-37-627-2025-supplement-title-page.pdf]

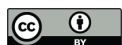

*Supplement of*

**Vielleaureite-(Ce), a new epidote of the dollaseite group,  
coexisting with Mn-dominant hellandite in Mn deposits  
of the central Pyrenees**

**Alain Ragu et al.**

*Correspondence to:* Luca Bindi ([luca.bindi@unifi.it](mailto:luca.bindi@unifi.it)) and Christian Chopin ([chopin@geologie.ens.fr](mailto:chopin@geologie.ens.fr))

- [ejm-37-627-2025-supplement-title-page.pdf](#)
- [2022-134\\_VIELLEAUREITE-\(Ce\).cif](#)
- [2022-134\\_VIELLEAUREITE-\(Ce\)\\_checkCIF.pdf](#)
- [Supplementary material\\_rev2\\_30\\_6\\_2025.pdf](#)

The copyright of individual parts of the supplement might differ from the article licence.
